# Supplementary material for: Enabling isotropic Li growth via Li foil facet-engineering for high-performance Li metal batteries
Source: Royal Society of Chemistry journal article supplement (doi:10.1039/d3ta05203f), 2023-01-01
Supplement: d3ta05203f1.pdf [file d3ta05203f1.pdf]

## Supplementary Information

### **Enabling isotropic Li growth via Li foil facet-engineering for high-performance Li metal batteries**

Yanyan Liu,<sup>a</sup> Shuyue Wang,<sup>a</sup> Minghao Sun,<sup>\*b</sup> Min Ling,<sup>\*a</sup> Shaodong Zhou<sup>\*a</sup> and  
Chengdu Liang,<sup>\*a</sup>

<sup>a</sup> Zhejiang Provincial Key Laboratory of Advanced Chemical Engineering of  
Manufacture Technology, College of Chemical and Biochemical Engineering, Zhejiang  
University, Hangzhou 310027, China

E-mail: [minling@zju.edu.cn](mailto:minling@zju.edu.cn), [szhou@zju.edu.cn](mailto:szhou@zju.edu.cn), [cdliang@zju.edu.cn](mailto:cdliang@zju.edu.cn)

<sup>b</sup> Institute of Zhejiang University-Quzhou, Quzhou 324000, China

E-mail: [smhykzy@163.com](mailto:smhykzy@163.com)

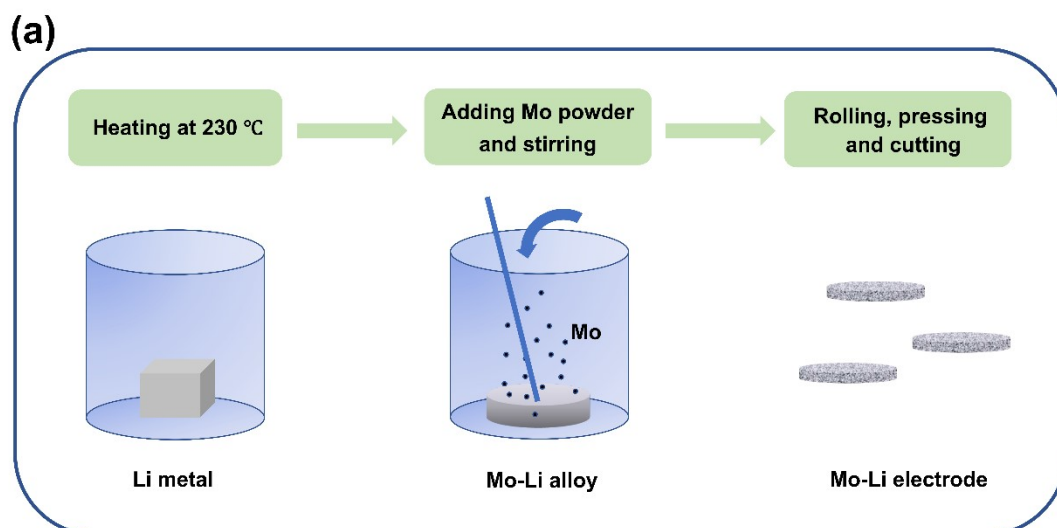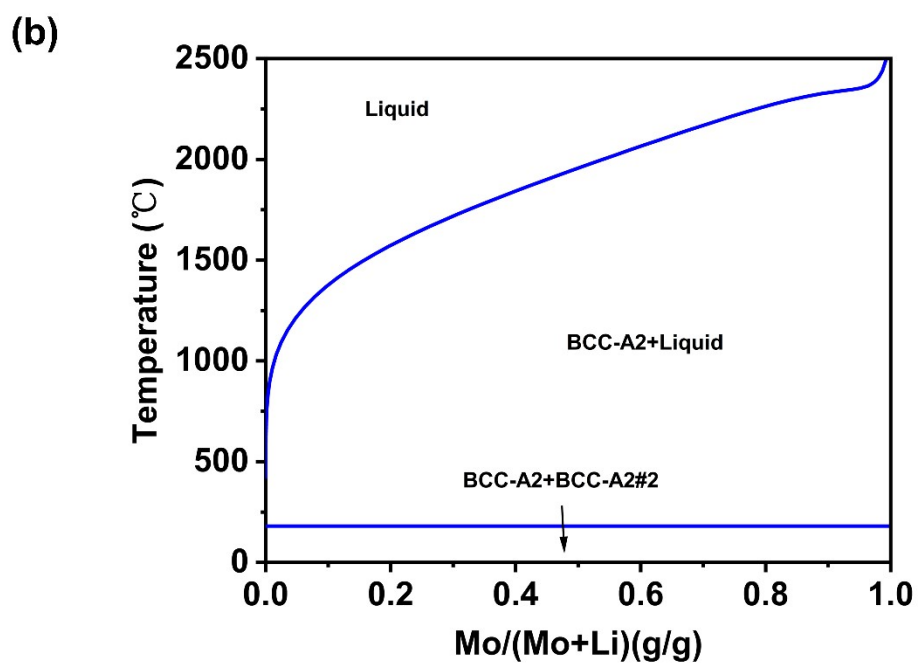

**Figure S1.** (a)Schematic of the fabrication process of Mo-Li electrode; (b) The phase diagram of Mo-Li binary system.'

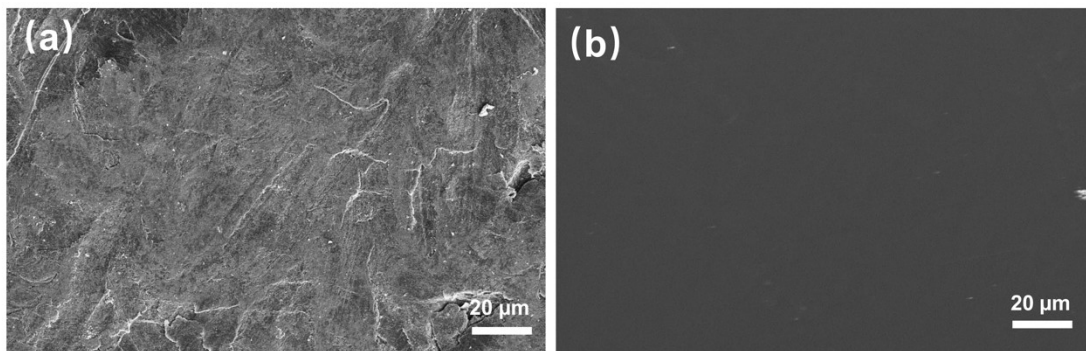

**Figure S2.** SEM images of bare Li (a) and Mo-Li-1 electrode (b). The surface of bare Li was rough and full of natural oxidation products with light contrast. While the surface of Mo-Li electrode was flat and smooth without any oxidation products, showing completely black in the color contrast.

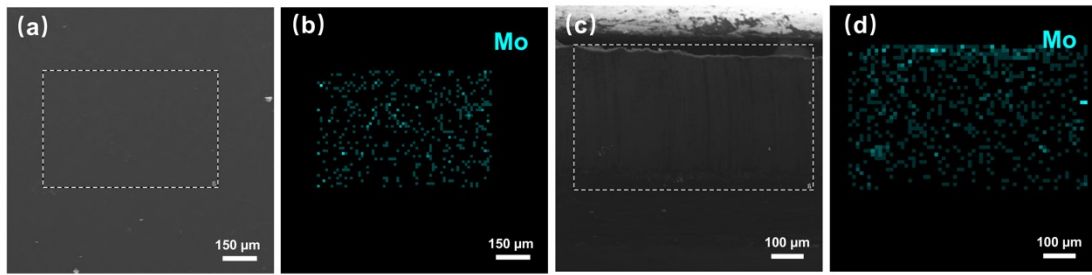

**Figure S3.** EDX mapping results of Mo-Li-1 electrode for the top surface and cross-section. (a) The SEM image of the top surface and its corresponding elemental mapping results (b); (c) The SEM image of the cross-section and its corresponding elemental mapping results (d).

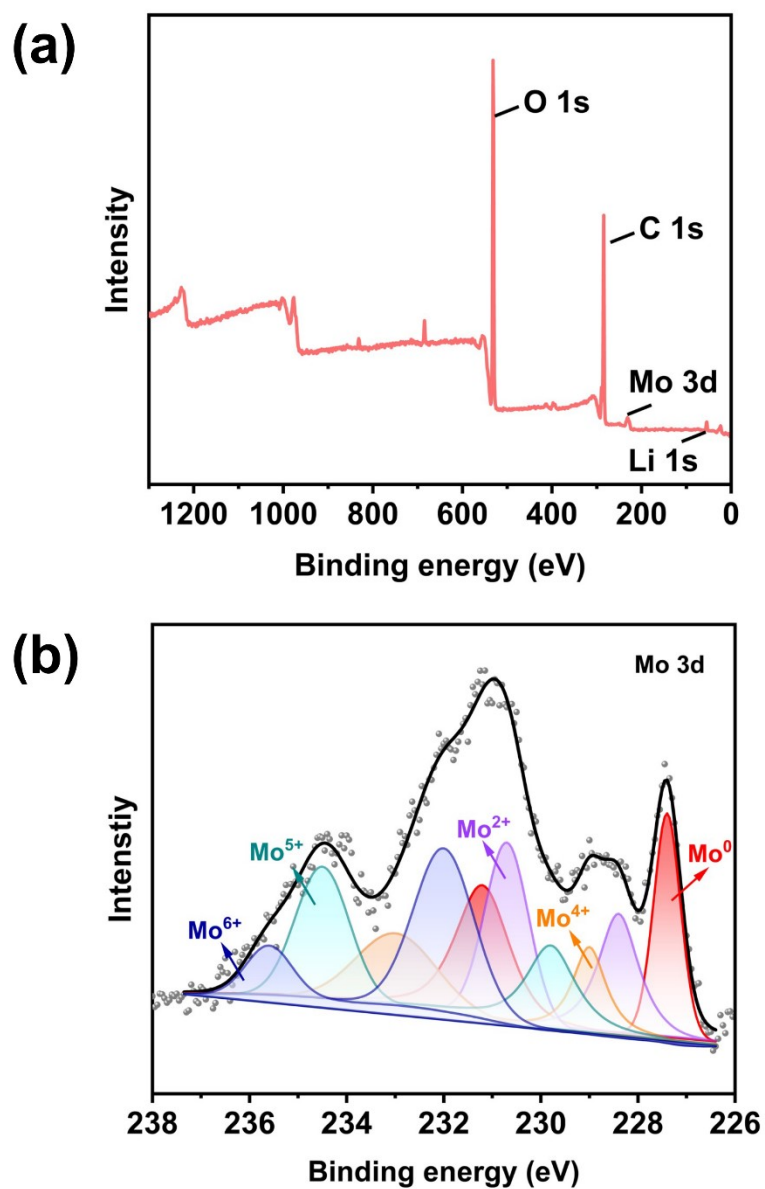

**Figure S4.** XPS spectrum of Mo-Li-1 electrode. (a) Full spectrum; (b) Mo 3d spectrum.

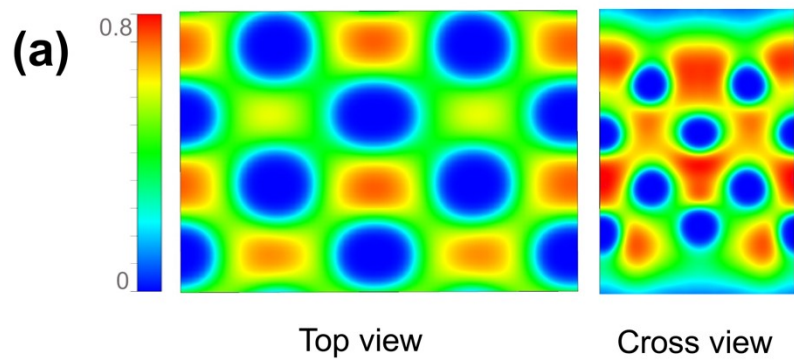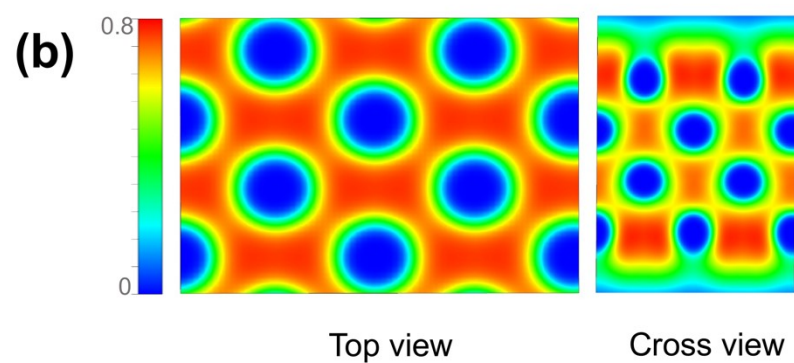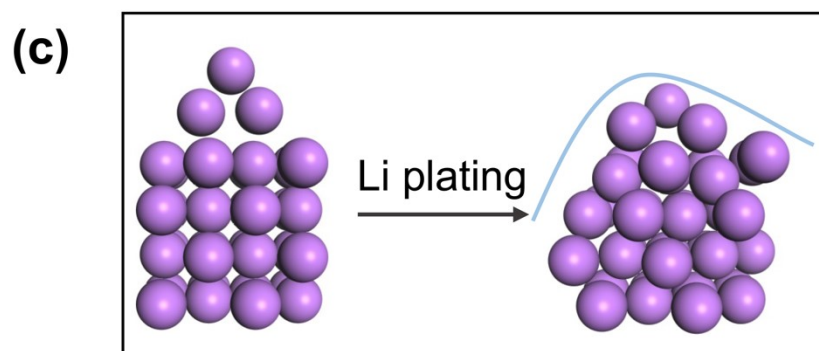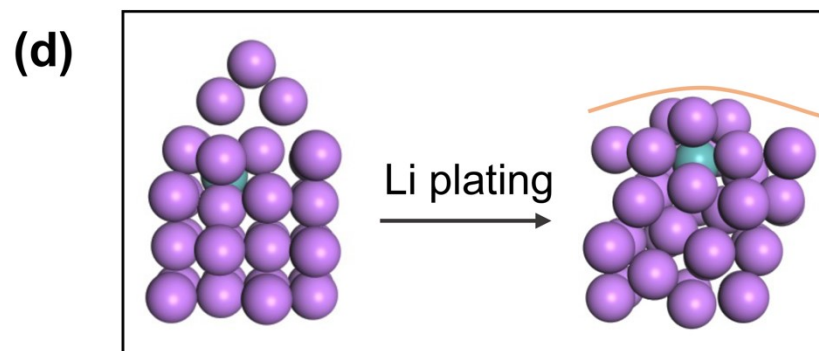

**Figure S5.** ELF results of Li (a) and Mo-Li-1 electrode (b); The deposition of Li cluster on the surface of Li (c) and Mo-Li-1 electrode (d).

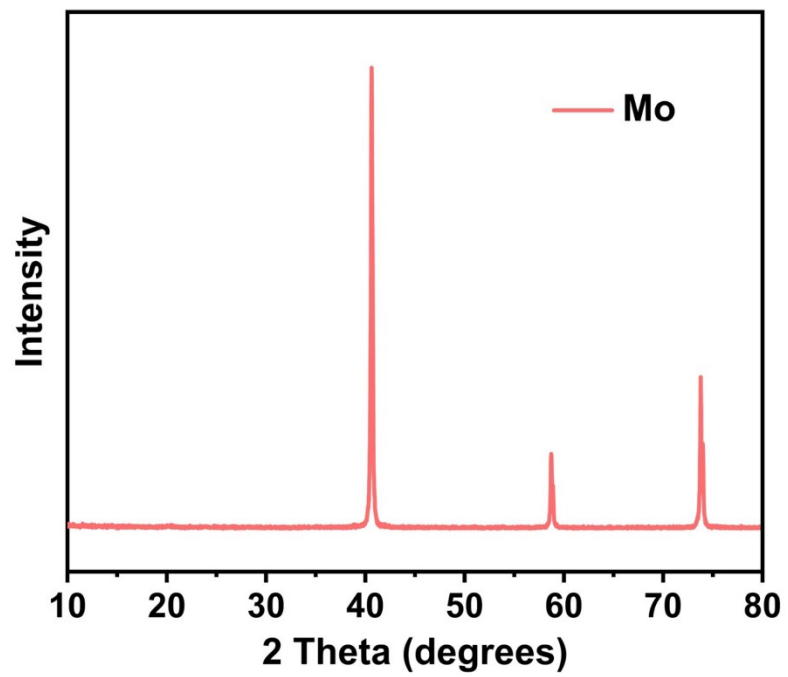

**Figure S6.** The XRD results of Mo powder.

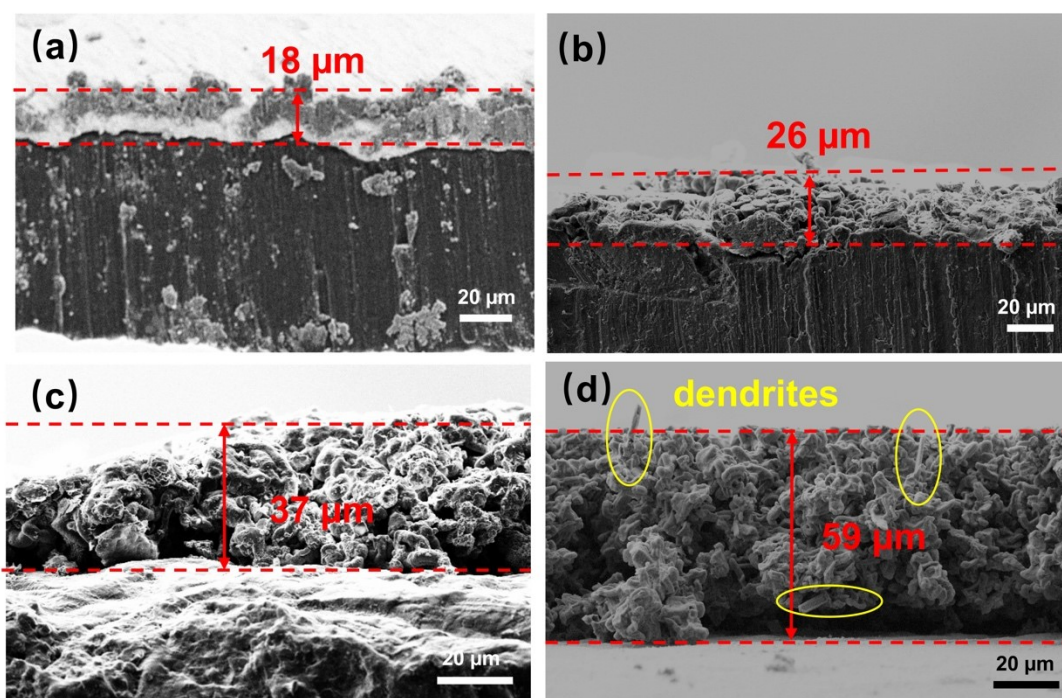

**Figure S7.** The cross-section morphologies of cycled electrodes. (a) Mo-Li-1; (b) Mo-Li-2; (c) Mo-Li-3; (d) bare Li.



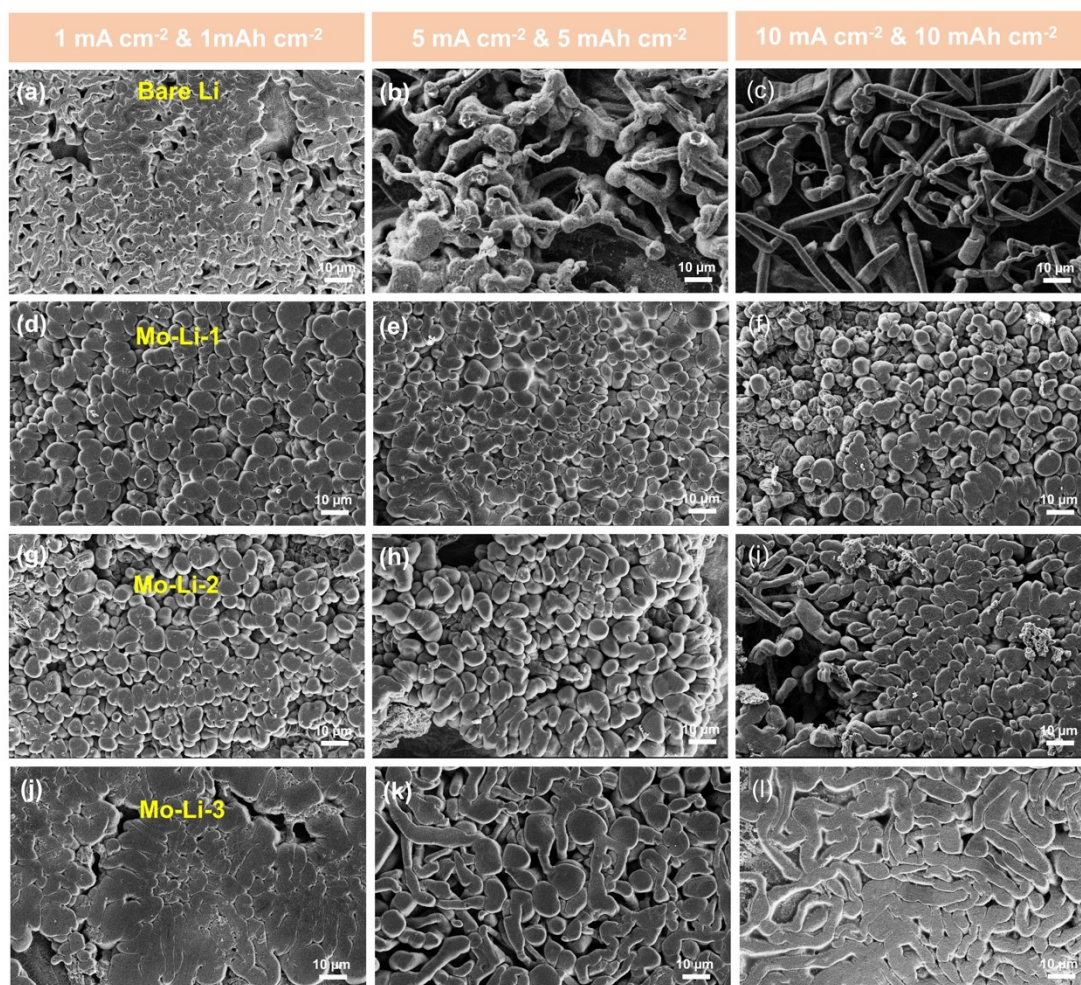

**Figure S8.** The surface morphologies of bare Li (a)-(c), Mo-Li-1(d)-(f), Mo-Li-2(g)-(i), Mo-Li-3(j)-(l) at different current densities. (a), (d), (g), (j) 1 mA cm<sup>-2</sup> for 1 mAh cm<sup>-2</sup>; (b), (e), (h), (k) 5 mA cm<sup>-2</sup> for 5 mAh cm<sup>-2</sup>; and (c), (f), (i), (l) 10 mA cm<sup>-2</sup> for 10 mAh cm<sup>-2</sup>.

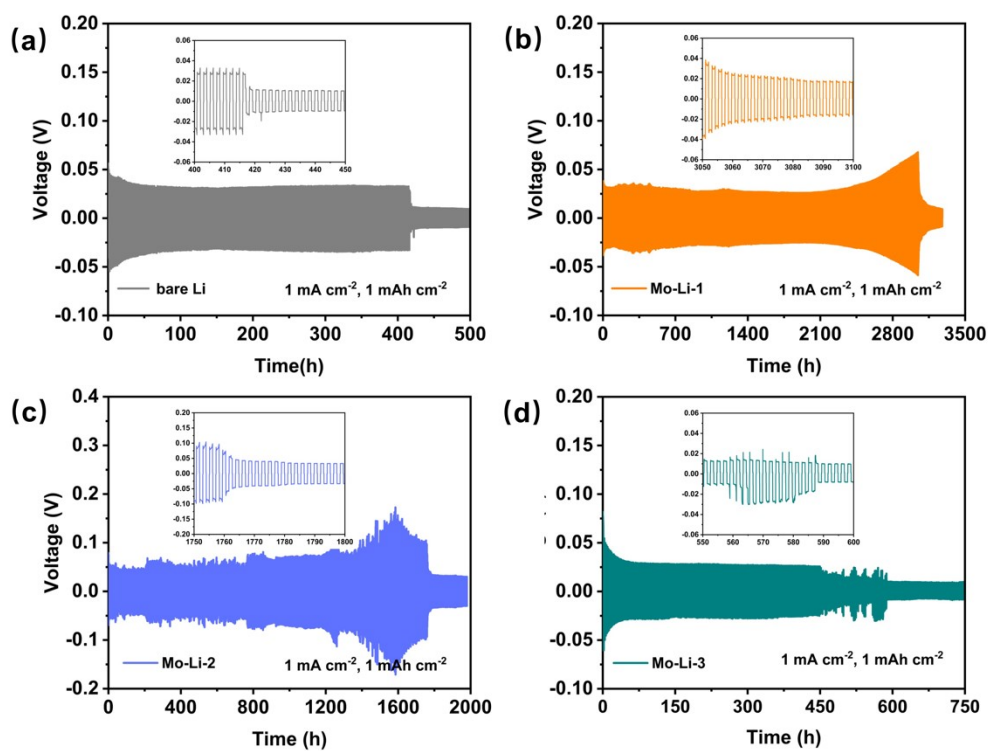

**Figure S9.** Voltage profiles of bare Li, Mo-Li-1, Mo-Li-2, and Mo-Li-3 anodes in symmetric cell at  $1 \text{ mA cm}^{-2}$  for  $1 \text{ mAh cm}^{-2}$ . The insets of each image are enlarged voltage profiles near the end of the cycle life.

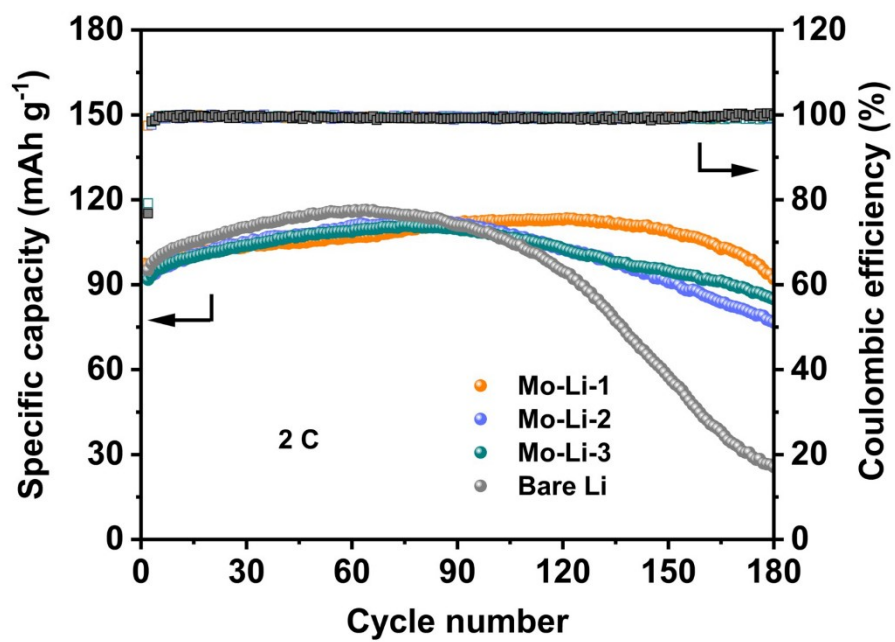

Figure S10. The long-term cycling of LFP full cells at 2C.

**Table S1.** The surface energy for the specific surface in the slab structures

| <b>Mo content</b> | <b>Crystal face</b>                        | <b>Atom</b> | <b>E<sub>slab</sub> (eV)</b> | <b>S (Å<sup>2</sup>)</b> | <b>γ (J cm<sup>-2</sup>)</b> |
|-------------------|--------------------------------------------|-------------|------------------------------|--------------------------|------------------------------|
| 0                 | <b>Bare Li (110)</b>                       | 48          | -94.86                       | 62.90                    | 0.54                         |
| 1/96              | <b>Mo<sub>1</sub>Li<sub>95</sub> (110)</b> | 96          | -194.74                      | 125.80                   | 0.81                         |
| 2/96              | <b>Mo<sub>2</sub>Li<sub>94</sub> (110)</b> | 96          | -199.32                      | 125.80                   | 0.87                         |
| 3/96              | <b>Mo<sub>3</sub>Li<sub>93</sub> (110)</b> | 96          | -204.34                      | 125.80                   | 0.91                         |
| 0                 | <b>Bare Li (200)</b>                       | 48          | -92.72                       | 88.91                    | 0.58                         |
| 1/96              | <b>Mo<sub>1</sub>Li<sub>95</sub> (200)</b> | 96          | -190.30                      | 177.82                   | 0.77                         |
| 2/96              | <b>Mo<sub>2</sub>Li<sub>94</sub> (200)</b> | 96          | -200.58                      | 177.82                   | 0.56                         |
| 3/96              | <b>Mo<sub>3</sub>Li<sub>93</sub> (200)</b> | 96          | -206.33                      | 177.82                   | 0.54                         |
| 0                 | <b>Bare Li (211)</b>                       | 48          | -89.48                       | 108.89                   | 0.71                         |
| 1/96              | <b>Mo<sub>1</sub>Li<sub>95</sub> (211)</b> | 96          | -183.85                      | 217.78                   | 0.87                         |
| 2/96              | <b>Mo<sub>2</sub>Li<sub>94</sub> (211)</b> | 96          | -189.28                      | 217.78                   | 0.86                         |
| 3/96              | <b>Mo<sub>3</sub>Li<sub>93</sub> (211)</b> | 96          | -193.38                      | 217.78                   | 0.92                         |

**Table S2.** The peak intensity ratio of various Li crystal faces.

| <b>Sample</b>  | <b><math>I_{(110)}/I_{(200)}</math></b> | <b><math>I_{(110)}/I_{(211)}</math></b> | <b><math>I_{(200)}/I_{(211)}</math></b> |
|----------------|-----------------------------------------|-----------------------------------------|-----------------------------------------|
| <b>Bare Li</b> | 2.37632275                              | 8.64856914                              | 3.6394758                               |
| <b>Mo-Li-1</b> | 1.02877698                              | 3.48780488                              | 3.3902439                               |
| <b>Mo-Li-2</b> | 0.59156555                              | 4.86998402                              | 8.23236577                              |
| <b>Mo-Li-3</b> | 0.05720985                              | 0.58353651                              | 10.1999303                              |
